# Supplementary material for: Monohydroxamic acids and bridging dihydroxamic acids as chelators to ruthenium(iii) and as nitric oxide donors: syntheses, speciation studies and nitric oxide releasing investigation
Source: Royal Society of Chemistry journal article supplement (doi:10.1039/b711863e), 2007-10-11
Supplement: b711863e.pdf [file b711863e.pdf]

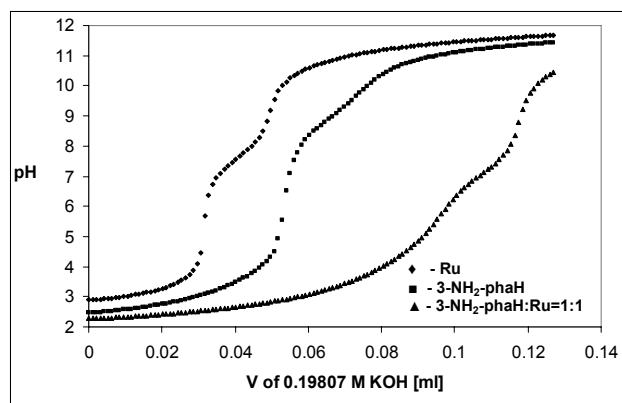

Fig. 1 Titration curves for Ru : 3-NH<sub>2</sub>-phaH system where Ru = K[Ru(Hedta)Cl].

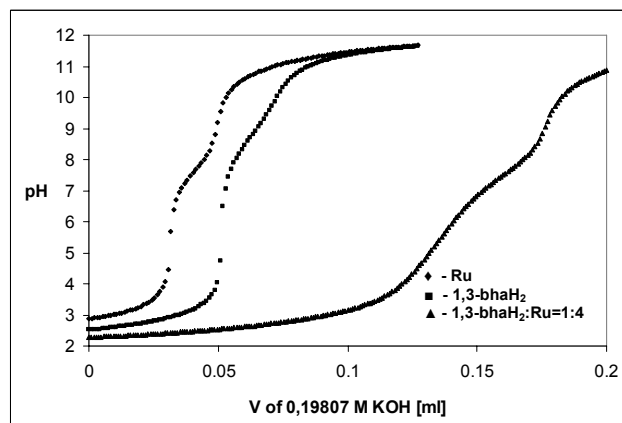

Fig. 2 Titration curves for Ru : 1,3-bhaH<sub>2</sub> system where Ru = K[Ru(Hedta)Cl].
